# Supplementary material
Source: HighWire-hosted journal article supplement (https://jitc.bmj.com/content/8/2/e000946)
Supplement: inline-supplementary-material-1 [file inline-supplementary-material-1.xlsx]

## Sheet: all_prediction_score_merged
Cohort	Gene Name	Uniprot ID	Substitution	Prediction FATHMM	Prediction Polyphen	Prediction Provean	Prediction Sift
Rome	NOTCH1	P46531	A1343T	PASSENGER/OTHER	probably damaging	Neutral	Tolerated
Rome	NOTCH1	P46531	A1918T	PASSENGER/OTHER	probably damaging	Deleterious	Damaging
Rome	NOTCH1	P46531	C429F	PASSENGER/OTHER	probably damaging	Deleterious	Damaging
Rome	NOTCH3	Q9UM47	G490A	PASSENGER/OTHER	probably damaging	Neutral	Tolerated
Rome	ATM	Q13315	D831G	CANCER	possibly damaging	Neutral	Damaging
Rome	ATM	Q13315	Y1124F	CANCER	possibly damaging	Neutral	Damaging
Rome	ATM	Q13315	Y2437H	CANCER	probably damaging	Neutral	Damaging
Rome	ATR	Q13535	R2074I	CANCER	benign	Deleterious	Damaging
Rome	ATR	Q13535	Q1226H	CANCER	possibly damaging	Neutral	Tolerated
Rome	BRCA1	P38398	G1048V	CANCER	possibly damaging	Deleterious	Damaging
Rome	BRCA2	P51587	F590C	PASSENGER/OTHER	probably damaging	Neutral	Damaging
Rome	BRCA2	P51587	P3280H	PASSENGER/OTHER	probably damaging	Deleterious	Damaging
Rome	BRCA2	P51587	S384F	PASSENGER/OTHER	benign	Deleterious	Tolerated
Rome	BRCA2	P51587	G1771D	PASSENGER/OTHER	probably damaging	Neutral	Damaging
Rome	CHEK2	O96017	T138I	CANCER	benign	Neutral	Tolerated
Rome	FANCA	O15360	A416D	PASSENGER/OTHER	probably damaging	Neutral	Tolerated
Rome	FANCA	O15360	L1143V	PASSENGER/OTHER	benign	Neutral	Tolerated
Rome	FANCC	Q00597	V60I	PASSENGER/OTHER	benign	Neutral	Tolerated
Rome	FANCG	O15287	A278V	PASSENGER/OTHER	benign	Neutral	Tolerated
Rome	MRE11	P49959	N556S	CANCER	benign	Neutral	Tolerated
Rome	PALB2	Q86YC2	L939W	PASSENGER/OTHER	probably damaging	Deleterious	Damaging
Rome	PALB2	Q86YC2	Y334C	PASSENGER/OTHER	benign	Deleterious	Tolerated
Rome	PALB2	Q86YC2	R753Q	PASSENGER/OTHER	benign	Neutral	Tolerated
Rome	POLD1	P28340	R525L	PASSENGER/OTHER	benign	Deleterious	Damaging
Rome	POLD1	P28340	V462M	PASSENGER/OTHER	possibly damaging	Deleterious	Damaging
Rome	POLE	Q07864	N662K	PASSENGER/OTHER	benign	Neutral	Tolerated
Rome	XRCC2	O43543	D82N	PASSENGER/OTHER	probably damaging	Deleterious	Damaging
MSKCC OS	NOTCH1	P46531	S333R	PASSENGER/OTHER	probably damaging	Deleterious	Damaging
MSKCC OS	NOTCH1	P46531	Q1076H	PASSENGER/OTHER	probably damaging	Deleterious	Damaging
MSKCC OS	NOTCH1	P46531	R1824L	PASSENGER/OTHER	probably damaging	Deleterious	Damaging
MSKCC OS	NOTCH1	P46531	C155S	CANCER	probably damaging	Deleterious	Damaging
MSKCC OS	NOTCH1	P46531	L2065V	PASSENGER/OTHER	benign	Deleterious	Damaging
MSKCC OS	NOTCH1	P46531	G1001C	PASSENGER/OTHER	probably damaging	Deleterious	Damaging
MSKCC OS	NOTCH1	P46531	R1784W	PASSENGER/OTHER	probably damaging	Deleterious	Damaging
MSKCC OS	NOTCH1	P46531	C1472W	CANCER	probably damaging	Deleterious	Damaging
MSKCC OS	NOTCH1	P46531	S2423L	PASSENGER/OTHER	possibly damaging	Neutral	Tolerated
MSKCC OS	NOTCH2	Q04721	D1454Y	CANCER	probably damaging	Deleterious	Damaging
MSKCC OS	NOTCH2	Q04721	G1232C	PASSENGER/OTHER	probably damaging	Deleterious	Damaging
MSKCC OS	NOTCH2	Q04721	S2200C	PASSENGER/OTHER	probably damaging	Deleterious	Damaging
MSKCC OS	NOTCH2	Q04721	A3F	PASSENGER/OTHER	probably damaging	Neutral	Tolerated
MSKCC OS	NOTCH2	Q04721	M2207I	PASSENGER/OTHER	benign	Neutral	Tolerated
MSKCC OS	NOTCH2	Q04721	C509Y	CANCER	probably damaging	Deleterious	Damaging
MSKCC OS	NOTCH2	Q04721	G2239R	PASSENGER/OTHER	possibly damaging	Neutral	Tolerated
MSKCC OS	NOTCH2	Q04721	D376H	PASSENGER/OTHER	probably damaging	Deleterious	Damaging
MSKCC OS	NOTCH2	Q04721	N1266I	PASSENGER/OTHER	probably damaging	Deleterious	Damaging
MSKCC OS	NOTCH2	Q04721	D549Y	PASSENGER/OTHER	probably damaging	Deleterious	Damaging
MSKCC OS	NOTCH3	Q9UM47	H2227Q	PASSENGER/OTHER	benign	Neutral	Tolerated
MSKCC OS	NOTCH3	Q9UM47	Q2304H	PASSENGER/OTHER	probably damaging	Neutral	Damaging
MSKCC OS	NOTCH3	Q9UM47	P2247H	PASSENGER/OTHER	probably damaging	Deleterious	Damaging
MSKCC OS	NOTCH3	Q9UM47	G2308V	PASSENGER/OTHER	probably damaging	Neutral	Damaging
MSKCC OS	NOTCH3	Q9UM47	C300F	PASSENGER/OTHER	probably damaging	Deleterious	Damaging
MSKCC OS	NOTCH3	Q9UM47	V633F	PASSENGER/OTHER	benign	Neutral	Damaging
MSKCC OS	NOTCH3	Q9UM47	S1871P	CANCER	possibly damaging	Neutral	Tolerated
MSKCC OS	NOTCH3	Q9UM47	V1289L	PASSENGER/OTHER	benign	Neutral	Tolerated
MSKCC OS	NOTCH3	Q9UM47	G821D	PASSENGER/OTHER	possibly damaging	Neutral	Damaging
MSKCC OS	NOTCH3	Q9UM47	Q1046H	PASSENGER/OTHER	benign	Neutral	Tolerated
MSKCC OS	ATM	Q13315	H1624L	CANCER	possibly damaging	Deleterious	Damaging
MSKCC OS	ATM	Q13315	G2063V	CANCER	probably damaging	Deleterious	Damaging
MSKCC OS	ATM	Q13315	G1676L	CANCER	probably damaging	Deleterious	Damaging
MSKCC OS	ATM	Q13315	H192N	CANCER	benign	Neutral	Damaging
MSKCC OS	ATM	Q13315	A1127S	CANCER	benign	Neutral	Damaging
MSKCC OS	ATM	Q13315	F2732L	CANCER	probably damaging	Deleterious	Damaging
MSKCC OS	ATM	Q13315	M1628L	PASSENGER/OTHER	benign	Neutral	Tolerated
MSKCC OS	ATM	Q13315	E2096V	CANCER	benign	Neutral	Tolerated
MSKCC OS	ATM	Q13315	A1427V	PASSENGER/OTHER	benign	Neutral	Tolerated
MSKCC OS	ATM	Q13315	D2959T	CANCER	possibly damaging	Neutral	Tolerated
MSKCC OS	ATM	Q13315	G2891D	CANCER	probably damaging	Deleterious	Damaging
MSKCC OS	ATM	Q13315	M1628V	PASSENGER/OTHER	benign	Neutral	Damaging
MSKCC OS	ATM	Q13315	I2888T	CANCER	probably damaging	Deleterious	Damaging
MSKCC OS	ATM	Q13315	E461D	PASSENGER/OTHER	possibly damaging	Neutral	Tolerated
MSKCC OS	ATM	Q13315	Y2334D	PASSENGER/OTHER	probably damaging	Deleterious	Damaging
MSKCC OS	ATM	Q13315	G529V	PASSENGER/OTHER	probably damaging	Deleterious	Damaging
MSKCC OS	ATM	Q13315	G2695C	CANCER	probably damaging	Deleterious	Damaging
MSKCC OS	ATM	Q13315	G2891D	CANCER	probably damaging	Deleterious	Damaging
MSKCC OS	ATR	Q13535	V1581L	PASSENGER/OTHER	possibly damaging	Neutral	Damaging
MSKCC OS	ATR	Q13535	N1314D	CANCER	probably damaging	Deleterious	Damaging
MSKCC OS	ATR	Q13535	I1014S	PASSENGER/OTHER	probably damaging	Deleterious	Damaging
MSKCC OS	ATR	Q13535	D1560Y	PASSENGER/OTHER	possibly damaging	Deleterious	Damaging
MSKCC OS	ATR	Q13535	L1307F	PASSENGER/OTHER	probably damaging	Deleterious	Damaging
MSKCC OS	ATR	Q13535	S191L	PASSENGER/OTHER	benign	Neutral	Tolerated
MSKCC OS	ATR	Q13535	N484K	PASSENGER/OTHER	benign	Neutral	Tolerated
MSKCC OS	ATR	Q13535	S2313C	PASSENGER/OTHER	benign	Deleterious	Damaging
MSKCC OS	ATR	Q13535	W2094L	PASSENGER/OTHER	probably damaging	Deleterious	Damaging
MSKCC OS	ATR	Q13535	D558Y	CANCER	benign	Neutral	Tolerated
MSKCC OS	ATR	Q13535	T2461I	CANCER	possibly damaging	Deleterious	Damaging
MSKCC OS	BRCA1	P38398	R1762M	PASSENGER/OTHER	possibly damaging	Neutral	Damaging
MSKCC OS	BRCA1	P38398	P334S	PASSENGER/OTHER	possibly damaging	Deleterious	Tolerated
MSKCC OS	BRCA1	P38398	L283V	CANCER	probably damaging	Deleterious	Damaging
MSKCC OS	BRCA1	P38398	V370I	PASSENGER/OTHER	benign	Neutral	Tolerated
MSKCC OS	BRCA1	P38398	R1751L	PASSENGER/OTHER	benign	Neutral	Damaging
MSKCC OS	BRCA1	P38398	S889C	CANCER	probably damaging	Deleterious	Damaging
MSKCC OS	BRCA1	P38398	E362G	PASSENGER/OTHER	possibly damaging	Deleterious	Damaging
MSKCC OS	BRCA1	P38398	E75K	PASSENGER/OTHER	possibly damaging	Neutral	Damaging
MSKCC OS	BRCA1	P38398	D1152N	CANCER	benign	Deleterious	Tolerated
MSKCC OS	BRCA2	P51587	L2929F	PASSENGER/OTHER	probably damaging	Neutral	Damaging
MSKCC OS	BRCA2	P51587	E1415K	PASSENGER/OTHER	possibly damaging	Neutral	Tolerated
MSKCC OS	BRCA2	P51587	E1035K	CANCER	probably damaging	Deleterious	Damaging
MSKCC OS	BRCA2	P51587	V2620D	CANCER	probably damaging	Neutral	Damaging
MSKCC OS	BRCA2	P51587	E3053Q	CANCER	benign	Neutral	Damaging
MSKCC OS	BRCA2	P51587	E3157Q	CANCER	probably damaging	Neutral	Damaging
MSKCC OS	BRCA2	P51587	D1161Y	PASSENGER/OTHER	probably damaging	Deleterious	Damaging
MSKCC OS	BRCA2	P51587	R2389G	CANCER	benign	Neutral	Tolerated
MSKCC OS	BRCA2	P51587	F3298A	PASSENGER/OTHER	probably damaging	Neutral	Damaging
MSKCC OS	BRCA2	P51587	T2412S	CANCER	probably damaging	Neutral	Damaging
MSKCC OS	BRCA2	P51587	E1465Q	PASSENGER/OTHER	benign	Neutral	Tolerated
MSKCC OS	BRCA2	P51587	P493S	PASSENGER/OTHER	benign	Neutral	Tolerated
MSKCC OS	BRCA2	P51587	M1149I	PASSENGER/OTHER	benign	Neutral	Tolerated
MSKCC OS	BRCA2	P51587	P2311A	CANCER	probably damaging	Neutral	Damaging
MSKCC OS	CHEK1	O14757	G169S	PASSENGER/OTHER	probably damaging	Deleterious	Damaging
MSKCC OS	CHEK2	O96017	G306R	PASSENGER/OTHER	probably damaging	Deleterious	Damaging
MSKCC OS	CHEK2	O96017	K325N	PASSENGER/OTHER	probably damaging	Deleterious	Damaging
MSKCC OS	CHEK2	O96017	G315W	PASSENGER/OTHER	probably damaging	Deleterious	Damaging
MSKCC OS	FANCA	O15360	R504L	PASSENGER/OTHER	probably damaging	Deleterious	Damaging
MSKCC OS	FANCA	O15360	E63Q	PASSENGER/OTHER	probably damaging	Neutral	Damaging
MSKCC OS	FANCA	O15360	K1299N	PASSENGER/OTHER	possibly damaging	Neutral	Tolerated
MSKCC OS	FANCA	O15360	G651V	PASSENGER/OTHER	probably damaging	Deleterious	Damaging
MSKCC OS	FANCA	O15360	A418V	PASSENGER/OTHER	probably damaging	Deleterious	Damaging
MSKCC OS	FANCA	O15360	S9F	PASSENGER/OTHER	possibly damaging	Neutral	Damaging
MSKCC OS	FANCC	Q00597	I312M	PASSENGER/OTHER	benign	Neutral	Tolerated
MSKCC OS	FANCC	Q00597	N58Y	PASSENGER/OTHER	probably damaging	Deleterious	Damaging
MSKCC OS	FANCC	Q00597	D33V	PASSENGER/OTHER	probably damaging	Deleterious	Damaging
MSKCC OS	FANCC	Q00597	D434N	PASSENGER/OTHER	possibly damaging	Neutral	Tolerated
MSKCC OS	MRE11	P49959	E207L	PASSENGER/OTHER	benign	Deleterious	Tolerated
MSKCC OS	MRE11	P49959	D622Y	CANCER	probably damaging	Deleterious	Damaging
MSKCC OS	MRE11	P49959	N100D	CANCER	benign	Deleterious	Tolerated
MSKCC OS	MRE11	P49959	D368Y	CANCER	probably damaging	Deleterious	Damaging
MSKCC OS	MUTYH	Q9UIF7	G23E	PASSENGER/OTHER	possibly damaging	Neutral	Tolerated
MSKCC OS	MUTYH	Q9UIF7	A221T	PASSENGER/OTHER	probably damaging	Deleterious	Damaging
MSKCC OS	MUTYH	Q9UIF7	E165D	PASSENGER/OTHER	benign	Deleterious	Tolerated
MSKCC OS	PALB2	Q86YC2	E426Q	PASSENGER/OTHER	probably damaging	Neutral	Damaging
MSKCC OS	PALB2	Q86YC2	C891W	PASSENGER/OTHER	probably damaging	Deleterious	Damaging
MSKCC OS	PALB2	Q86YC2	E672D	PASSENGER/OTHER	benign	Neutral	Tolerated
MSKCC OS	PALB2	Q86YC2	C419F	PASSENGER/OTHER	possibly damaging	Deleterious	Tolerated
MSKCC OS	PALB2	Q86YC2	T274S	PASSENGER/OTHER	possibly damaging	Neutral	Tolerated
MSKCC OS	PALB2	Q86YC2	A188S	PASSENGER/OTHER	benign	Neutral	Tolerated
MSKCC OS	PALB2	Q86YC2	A900V	PASSENGER/OTHER	benign	Neutral	Damaging
MSKCC OS	PALB2	Q86YC2	L583F	PASSENGER/OTHER	probably damaging	Neutral	Tolerated
MSKCC OS	PALB2	Q86YC2	G998E	PASSENGER/OTHER	probably damaging	Deleterious	Damaging
MSKCC OS	POLE	Q07864	M487V	PASSENGER/OTHER	possibly damaging	Deleterious	Damaging
MSKCC OS	POLE	Q07864	L424V	PASSENGER/OTHER	probably damaging	Deleterious	Damaging
MSKCC OS	POLE	Q07864	A1140T	PASSENGER/OTHER	benign	Neutral	Tolerated
MSKCC OS	POLE	Q07864	L1119F	PASSENGER/OTHER	possibly damaging	Deleterious	Tolerated
MSKCC OS	POLE	Q07864	E1035K	PASSENGER/OTHER	probably damaging	Deleterious	Damaging
MSKCC OS	POLE	Q07864	Q1993L	PASSENGER/OTHER	probably damaging	Deleterious	Damaging
MSKCC OS	POLE	Q07864	E18K	PASSENGER/OTHER	benign	Neutral	Tolerated
MSKCC OS	POLE	Q07864	D1422H	PASSENGER/OTHER	benign	Deleterious	Tolerated
MSKCC OS	POLE	Q07864	E915K	PASSENGER/OTHER	benign	Neutral	Tolerated
MSKCC OS	POLE	Q07864	D339N	PASSENGER/OTHER	benign	Neutral	Tolerated
MSKCC OS	POLE	Q07864	R93K	PASSENGER/OTHER	benign	Deleterious	Tolerated
MSKCC OS	POLE	Q07864	R1284W	PASSENGER/OTHER	probably damaging	Deleterious	Damaging
MSKCC OS	POLE	Q07864	S1650C	PASSENGER/OTHER	benign	Neutral	Tolerated
MSKCC OS	POLE	Q07864	R1932C	PASSENGER/OTHER	possibly damaging	Neutral	Tolerated
MSKCC OS	POLE	Q07864	D435Y	PASSENGER/OTHER	probably damaging	Deleterious	Damaging
MSKCC OS	POLE	Q07864	G1305V	PASSENGER/OTHER	benign	Neutral	Tolerated
MSKCC OS	POLE	Q07864	M645I	PASSENGER/OTHER	benign	Neutral	Tolerated
MSKCC OS	POLE	Q07864	G1343S	PASSENGER/OTHER	probably damaging	Deleterious	Damaging
MSKCC OS	RAD51	Q06609	E258Q	PASSENGER/OTHER	possibly damaging	Deleterious	Tolerated
MSKCC OS	RAD51B	O15315	R74M	PASSENGER/OTHER	probably damaging	Deleterious	Damaging
MSKCC OS	RAD51B	O15315	G10C	PASSENGER/OTHER	probably damaging	Deleterious	Damaging
MSKCC OS	RAD51B	O15315	I155M	PASSENGER/OTHER	benign	Neutral	Tolerated
MSKCC OS	RAD51B	O15315	K205N	PASSENGER/OTHER	probably damaging	Deleterious	Damaging
MSKCC OS	RAD51C	O43502	S105L	PASSENGER/OTHER	possibly damaging	Deleterious	Tolerated
MSKCC OS	RAD51D	O75771	P10H	PASSENGER/OTHER	probably damaging	Deleterious	Damaging
MSKCC OS	RAD54L	Q92698	F47I	PASSENGER/OTHER	benign	Neutral	Tolerated
MSKCC PFS	ATM	Q13315	H1624L	CANCER	possibly damaging	Deleterious	Damaging
MSKCC PFS	ATM	Q13315	G2063V	CANCER	probably damaging	Deleterious	Damaging
MSKCC PFS	ATM	Q13315	H192N	CANCER	benign	Neutral	Damaging
MSKCC PFS	ATM	Q13315	A1127S	CANCER	benign	Neutral	Damaging
MSKCC PFS	ATM	Q13315	F2732L	CANCER	probably damaging	Deleterious	Damaging
MSKCC PFS	ATM	Q13315	M1628L	PASSENGER/OTHER	benign	Neutral	Tolerated
MSKCC PFS	ATM	Q13315	E2096V	CANCER	benign	Neutral	Tolerated
MSKCC PFS	ATM	Q13315	A1427V	PASSENGER/OTHER	benign	Neutral	Tolerated
MSKCC PFS	ATM	Q13315	G2891D	CANCER	probably damaging	Deleterious	Damaging
MSKCC PFS	ATM	Q13315	I2888T	CANCER	probably damaging	Deleterious	Damaging
MSKCC PFS	ATM	Q13315	E461D	PASSENGER/OTHER	possibly damaging	Neutral	Tolerated
MSKCC PFS	ATM	Q13315	Y2334D	PASSENGER/OTHER	probably damaging	Deleterious	Damaging
MSKCC PFS	ATM	Q13315	G529V	PASSENGER/OTHER	probably damaging	Deleterious	Damaging
MSKCC PFS	ATM	Q13315	G2695C	CANCER	probably damaging	Deleterious	Damaging
MSKCC PFS	ATM	Q13315	W1058C	CANCER	probably damaging	Deleterious	Damaging
MSKCC PFS	ATM	Q13315	G2891D	CANCER	probably damaging	Deleterious	Damaging
MSKCC PFS	ATR	Q13535	R2431M	CANCER	probably damaging	Deleterious	Damaging
MSKCC PFS	ATR	Q13535	V1581L	PASSENGER/OTHER	possibly damaging	Neutral	Damaging
MSKCC PFS	ATR	Q13535	N1314D	CANCER	probably damaging	Deleterious	Damaging
MSKCC PFS	ATR	Q13535	D1560Y	PASSENGER/OTHER	possibly damaging	Deleterious	Damaging
MSKCC PFS	ATR	Q13535	N484K	PASSENGER/OTHER	benign	Neutral	Tolerated
MSKCC PFS	ATR	Q13535	W2094L	PASSENGER/OTHER	probably damaging	Deleterious	Damaging
MSKCC PFS	ATR	Q13535	T2461I	CANCER	possibly damaging	Deleterious	Damaging
MSKCC PFS	BRCA1	P38398	R1762M	PASSENGER/OTHER	possibly damaging	Neutral	Damaging
MSKCC PFS	BRCA1	P38398	P334S	PASSENGER/OTHER	possibly damaging	Deleterious	Tolerated
MSKCC PFS	BRCA1	P38398	V370I	PASSENGER/OTHER	benign	Neutral	Tolerated
MSKCC PFS	BRCA1	P38398	S889C	CANCER	probably damaging	Deleterious	Damaging
MSKCC PFS	BRCA1	P38398	G1624W	PASSENGER/OTHER	possibly damaging	Neutral	Damaging
MSKCC PFS	BRCA1	P38398	D1152N	CANCER	benign	Deleterious	Tolerated
MSKCC PFS	BRCA2	P51587	E1035K	CANCER	probably damaging	Deleterious	Damaging
MSKCC PFS	BRCA2	P51587	V2620D	CANCER	probably damaging	Neutral	Damaging
MSKCC PFS	BRCA2	P51587	E3053Q	CANCER	benign	Neutral	Damaging
MSKCC PFS	BRCA2	P51587	N1599S	PASSENGER/OTHER	benign	Neutral	Tolerated
MSKCC PFS	BRCA2	P51587	E3157Q	CANCER	probably damaging	Neutral	Damaging
MSKCC PFS	BRCA2	P51587	R2389G	CANCER	benign	Neutral	Tolerated
MSKCC PFS	BRCA2	P51587	T2412S	CANCER	probably damaging	Neutral	Damaging
MSKCC PFS	BRCA2	P51587	P493S	PASSENGER/OTHER	benign	Neutral	Tolerated
MSKCC PFS	BRCA2	P51587	P2311A	CANCER	probably damaging	Neutral	Damaging
MSKCC PFS	CHEK1	O14757	G169S	PASSENGER/OTHER	probably damaging	Deleterious	Damaging
MSKCC PFS	CHEK2	O96017	G306R	PASSENGER/OTHER	probably damaging	Deleterious	Damaging
MSKCC PFS	CHEK2	O96017	R346G	PASSENGER/OTHER	probably damaging	Deleterious	Damaging
MSKCC PFS	CHEK2	O96017	K325N	PASSENGER/OTHER	probably damaging	Deleterious	Damaging
MSKCC PFS	FANCA	O15360	R504L	PASSENGER/OTHER	probably damaging	Deleterious	Damaging
MSKCC PFS	FANCA	O15360	S357L	PASSENGER/OTHER	benign	Deleterious	Tolerated
MSKCC PFS	FANCA	O15360	E63Q	PASSENGER/OTHER	probably damaging	Neutral	Damaging
MSKCC PFS	FANCA	O15360	G651V	PASSENGER/OTHER	probably damaging	Deleterious	Damaging
MSKCC PFS	FANCA	O15360	S96F	PASSENGER/OTHER	probably damaging	Deleterious	Damaging
MSKCC PFS	FANCA	O15360	S9F	PASSENGER/OTHER	possibly damaging	Neutral	Damaging
MSKCC PFS	FANCC	Q00597	I312M	PASSENGER/OTHER	benign	Neutral	Tolerated
MSKCC PFS	FANCC	Q00597	N58Y	PASSENGER/OTHER	probably damaging	Deleterious	Damaging
MSKCC PFS	FANCC	Q00597	D33V	PASSENGER/OTHER	probably damaging	Deleterious	Damaging
MSKCC PFS	MUTYH	Q9UIF7	G23E	PASSENGER/OTHER	possibly damaging	Neutral	Tolerated
MSKCC PFS	MUTYH	Q9UIF7	A221T	PASSENGER/OTHER	probably damaging	Deleterious	Damaging
MSKCC PFS	MUTYH	Q9UIF7	E165D	PASSENGER/OTHER	benign	Deleterious	Tolerated
MSKCC PFS	MUTYH	Q9UIF7	G218W	PASSENGER/OTHER	probably damaging	Deleterious	Damaging
MSKCC PFS	PALB2	Q86YC2	E426K	PASSENGER/OTHER	probably damaging	Deleterious	Damaging
MSKCC PFS	PALB2	Q86YC2	C891W	PASSENGER/OTHER	probably damaging	Deleterious	Damaging
MSKCC PFS	PALB2	Q86YC2	E672D	PASSENGER/OTHER	benign	Neutral	Tolerated
MSKCC PFS	PALB2	Q86YC2	T274S	PASSENGER/OTHER	possibly damaging	Neutral	Tolerated
MSKCC PFS	PALB2	Q86YC2	A188S	PASSENGER/OTHER	benign	Neutral	Tolerated
MSKCC PFS	POLE	Q07864	M487V	PASSENGER/OTHER	possibly damaging	Deleterious	Damaging
MSKCC PFS	POLE	Q07864	L424V	PASSENGER/OTHER	probably damaging	Deleterious	Damaging
MSKCC PFS	POLE	Q07864	A1140T	PASSENGER/OTHER	benign	Neutral	Tolerated
MSKCC PFS	POLE	Q07864	L1119F	PASSENGER/OTHER	possibly damaging	Deleterious	Tolerated
MSKCC PFS	POLE	Q07864	E1035K	PASSENGER/OTHER	probably damaging	Deleterious	Damaging
MSKCC PFS	POLE	Q07864	Q1993L	PASSENGER/OTHER	probably damaging	Deleterious	Damaging
MSKCC PFS	POLE	Q07864	V1426A	PASSENGER/OTHER	probably damaging	Deleterious	Damaging
MSKCC PFS	POLE	Q07864	R976H	PASSENGER/OTHER	probably damaging	Deleterious	Damaging
MSKCC PFS	POLE	Q07864	R93K	PASSENGER/OTHER	benign	Deleterious	Tolerated
MSKCC PFS	POLE	Q07864	R1284W	PASSENGER/OTHER	probably damaging	Deleterious	Damaging
MSKCC PFS	POLE	Q07864	E1912K	PASSENGER/OTHER	benign	Neutral	Tolerated
MSKCC PFS	POLE	Q07864	G1305V	PASSENGER/OTHER	benign	Neutral	Tolerated
MSKCC PFS	RAD51	Q06609	E258Q	PASSENGER/OTHER	possibly damaging	Deleterious	Tolerated
MSKCC PFS	RAD51B	O15315	R74M	PASSENGER/OTHER	probably damaging	Deleterious	Damaging
MSKCC PFS	RAD51B	O15315	I155M	PASSENGER/OTHER	benign	Neutral	Tolerated
MSKCC PFS	RAD51C	O43502	S105L	PASSENGER/OTHER	possibly damaging	Deleterious	Tolerated
MSKCC PFS	RAD51D	O75771	P10H	PASSENGER/OTHER	probably damaging	Deleterious	Damaging
MSKCC PFS	RAD54L	Q92698	K515R	PASSENGER/OTHER	possibly damaging	Deleterious	Tolerated
MSKCC PFS	NOTCH1	P46531	A1741R	PASSENGER/OTHER	possibly damaging	Neutral	Damaging
MSKCC PFS	NOTCH1	P46531	Q1076H	PASSENGER/OTHER	probably damaging	Deleterious	Damaging
MSKCC PFS	NOTCH1	P46531	R1824L	PASSENGER/OTHER	probably damaging	Deleterious	Damaging
MSKCC PFS	NOTCH1	P46531	C155S	CANCER	probably damaging	Deleterious	Damaging
MSKCC PFS	NOTCH1	P46531	L2065V	PASSENGER/OTHER	benign	Deleterious	Damaging
MSKCC PFS	NOTCH1	P46531	Q184R	PASSENGER/OTHER	benign	Neutral	Tolerated
MSKCC PFS	NOTCH1	P46531	G1001C	PASSENGER/OTHER	probably damaging	Deleterious	Damaging
MSKCC PFS	NOTCH1	P46531	R1784W	PASSENGER/OTHER	probably damaging	Deleterious	Damaging
MSKCC PFS	NOTCH1	P46531	C1472W	CANCER	probably damaging	Deleterious	Damaging
MSKCC PFS	NOTCH1	P46531	S2423L	PASSENGER/OTHER	possibly damaging	Neutral	Tolerated
MSKCC PFS	NOTCH2	Q04721	D1454Y	CANCER	probably damaging	Deleterious	Damaging
MSKCC PFS	NOTCH2	Q04721	G1232C	PASSENGER/OTHER	probably damaging	Deleterious	Damaging
MSKCC PFS	NOTCH2	Q04721	A3F	PASSENGER/OTHER	probably damaging	Neutral	Tolerated
MSKCC PFS	NOTCH2	Q04721	M2207I	PASSENGER/OTHER	benign	Neutral	Tolerated
MSKCC PFS	NOTCH2	Q04721	D1846N	PASSENGER/OTHER	possibly damaging	Neutral	Tolerated
MSKCC PFS	NOTCH2	Q04721	G2239R	PASSENGER/OTHER	possibly damaging	Neutral	Tolerated
MSKCC PFS	NOTCH2	Q04721	D376H	PASSENGER/OTHER	probably damaging	Deleterious	Damaging
MSKCC PFS	NOTCH2	Q04721	N1266I	PASSENGER/OTHER	probably damaging	Deleterious	Damaging
MSKCC PFS	NOTCH3	Q9UM47	H2227Q	PASSENGER/OTHER	benign	Neutral	Tolerated
MSKCC PFS	NOTCH3	Q9UM47	Q2304H	PASSENGER/OTHER	probably damaging	Neutral	Damaging
MSKCC PFS	NOTCH3	Q9UM47	A1802G	PASSENGER/OTHER	benign	Neutral	Tolerated
MSKCC PFS	NOTCH3	Q9UM47	G2308V	PASSENGER/OTHER	probably damaging	Neutral	Damaging
MSKCC PFS	NOTCH3	Q9UM47	C300F	PASSENGER/OTHER	probably damaging	Deleterious	Damaging
MSKCC PFS	NOTCH3	Q9UM47	V633F	PASSENGER/OTHER	benign	Neutral	Damaging
MSKCC PFS	NOTCH3	Q9UM47	S1871P	CANCER	possibly damaging	Neutral	Tolerated
MSKCC PFS	NOTCH3	Q9UM47	V1289L	PASSENGER/OTHER	benign	Neutral	Tolerated
OAK/POPLAR	NOTCH1	P46531	G72E	PASSENGER/OTHER	probably damaging	Deleterious	Damaging
OAK/POPLAR	NOTCH1	P46531	S2289I	PASSENGER/OTHER	benign	Neutral	Tolerated
OAK/POPLAR	NOTCH1	P46531	S65R	PASSENGER/OTHER	benign	Neutral	Tolerated
OAK/POPLAR	NOTCH1	P46531	R1523C	PASSENGER/OTHER	possibly damaging	Deleterious	Damaging
OAK/POPLAR	NOTCH1	P46531	C998F	CANCER	probably damaging	Deleterious	Damaging
OAK/POPLAR	NOTCH1	P46531	W1089C	PASSENGER/OTHER	probably damaging	Deleterious	Damaging
OAK/POPLAR	NOTCH1	P46531	A1635V	PASSENGER/OTHER	benign	Neutral	Tolerated
OAK/POPLAR	NOTCH1	P46531	S2467W	PASSENGER/OTHER	probably damaging	Neutral	Damaging
OAK/POPLAR	NOTCH1	P46531	G1266W	PASSENGER/OTHER	probably damaging	Deleterious	Damaging
OAK/POPLAR	NOTCH1	P46531	S2215L	PASSENGER/OTHER	probably damaging	Deleterious	Damaging
OAK/POPLAR	NOTCH1	P46531	D1185Y	PASSENGER/OTHER	possibly damaging	Deleterious	Damaging
OAK/POPLAR	NOTCH1	P46531	D1870N	PASSENGER/OTHER	possibly damaging	Deleterious	Damaging
OAK/POPLAR	NOTCH1	P46531	Q1837R	PASSENGER/OTHER	benign	Neutral	Tolerated
OAK/POPLAR	NOTCH1	P46531	I908M	PASSENGER/OTHER	possibly damaging	Neutral	Damaging
OAK/POPLAR	NOTCH1	P46531	D2099H	PASSENGER/OTHER	probably damaging	Deleterious	Damaging
OAK/POPLAR	NOTCH2	Q04721	G1620C	CANCER	probably damaging	Deleterious	Damaging
OAK/POPLAR	NOTCH2	Q04721	S1407L	PASSENGER/OTHER	benign	Deleterious	Tolerated
OAK/POPLAR	NOTCH2	Q04721	G370R	PASSENGER/OTHER	probably damaging	Deleterious	Damaging
OAK/POPLAR	NOTCH2	Q04721	C309Y	PASSENGER/OTHER	probably damaging	Deleterious	Damaging
OAK/POPLAR	NOTCH2	Q04721	G2449A	PASSENGER/OTHER	benign	Neutral	Tolerated
OAK/POPLAR	NOTCH2	Q04721	L1426V	PASSENGER/OTHER	benign	Neutral	Tolerated
OAK/POPLAR	NOTCH2	Q04721	R452H	PASSENGER/OTHER	probably damaging	Deleterious	Damaging
OAK/POPLAR	NOTCH2	Q04721	C1632Y	CANCER	probably damaging	Deleterious	Damaging
OAK/POPLAR	NOTCH2	Q04721	G2021W	CANCER	probably damaging	Deleterious	Damaging
OAK/POPLAR	NOTCH2	Q04721	P2463T	PASSENGER/OTHER	benign	Neutral	Tolerated
OAK/POPLAR	NOTCH2	Q04721	A1901T	PASSENGER/OTHER	probably damaging	Deleterious	Damaging
OAK/POPLAR	NOTCH2	Q04721	D1898G	CANCER	probably damaging	Deleterious	Damaging
OAK/POPLAR	NOTCH2	Q04721	D1204Y	PASSENGER/OTHER	probably damaging	Deleterious	Damaging
OAK/POPLAR	NOTCH2	Q04721	V1863F	CANCER	possibly damaging	Deleterious	Damaging
OAK/POPLAR	NOTCH2	Q04721	R2105L	PASSENGER/OTHER	probably damaging	Deleterious	Damaging
OAK/POPLAR	NOTCH2	Q04721	S381I	PASSENGER/OTHER	probably damaging	Deleterious	Damaging
OAK/POPLAR	NOTCH2	Q04721	P1364A	PASSENGER/OTHER	possibly damaging	Deleterious	Tolerated
OAK/POPLAR	NOTCH2	Q04721	V1990L	PASSENGER/OTHER	probably damaging	Deleterious	Damaging
OAK/POPLAR	NOTCH2	Q04721	M906L	PASSENGER/OTHER	benign	Neutral	Tolerated
OAK/POPLAR	NOTCH2	Q04721	N1723H	PASSENGER/OTHER	possibly damaging	Neutral	Tolerated
OAK/POPLAR	NOTCH3	Q9UM47	P2243T	PASSENGER/OTHER	probably damaging	Deleterious	Tolerated
OAK/POPLAR	NOTCH3	Q9UM47	P1254A	PASSENGER/OTHER	probably damaging	Deleterious	Damaging
OAK/POPLAR	NOTCH3	Q9UM47	L33P	PASSENGER/OTHER	benign	Neutral	Tolerated
OAK/POPLAR	NOTCH3	Q9UM47	R6C	PASSENGER/OTHER	benign	Neutral	Damaging
OAK/POPLAR	NOTCH3	Q9UM47	R1465C	PASSENGER/OTHER	benign	Deleterious	Damaging
OAK/POPLAR	NOTCH3	Q9UM47	D448E	PASSENGER/OTHER	probably damaging	Deleterious	Damaging
OAK/POPLAR	NOTCH3	Q9UM47	P22L	PASSENGER/OTHER	benign	Neutral	Tolerated
OAK/POPLAR	NOTCH3	Q9UM47	P1444T	PASSENGER/OTHER	possibly damaging	Neutral	Tolerated
OAK/POPLAR	NOTCH3	Q9UM47	P1595L	PASSENGER/OTHER	benign	Neutral	Tolerated
OAK/POPLAR	NOTCH3	Q9UM47	A818T	PASSENGER/OTHER	benign	Neutral	Tolerated
OAK/POPLAR	NOTCH3	Q9UM47	H706N	PASSENGER/OTHER	probably damaging	Deleterious	Tolerated
OAK/POPLAR	NOTCH3	Q9UM47	D1966G	PASSENGER/OTHER	probably damaging	Deleterious	Damaging
OAK/POPLAR	NOTCH3	Q9UM47	P205Q	CANCER	benign	Deleterious	Tolerated
OAK/POPLAR	ATM	Q13315	L904W	CANCER	probably damaging	Deleterious	Damaging
OAK/POPLAR	ATM	Q13315	H354D	PASSENGER/OTHER	probably damaging	Deleterious	Damaging
OAK/POPLAR	ATM	Q13315	C1831Y	CANCER	probably damaging	Deleterious	Tolerated
OAK/POPLAR	ATM	Q13315	F2410L	CANCER	probably damaging	Deleterious	Damaging
OAK/POPLAR	ATM	Q13315	E2094K	CANCER	probably damaging	Neutral	Damaging
OAK/POPLAR	ATM	Q13315	Y155C	CANCER	probably damaging	Deleterious	Damaging
OAK/POPLAR	ATM	Q13315	A1127G	CANCER	benign	Neutral	Damaging
OAK/POPLAR	ATM	Q13315	A1954V	CANCER	probably damaging	Deleterious	Damaging
OAK/POPLAR	ATM	Q13315	A2466V	PASSENGER/OTHER	probably damaging	Deleterious	Damaging
OAK/POPLAR	ATM	Q13315	L1524R	CANCER	probably damaging	Deleterious	Damaging
OAK/POPLAR	ATM	Q13315	D2595G	CANCER	probably damaging	Deleterious	Damaging
OAK/POPLAR	ATM	Q13315	R337G	CANCER	probably damaging	Deleterious	Damaging
OAK/POPLAR	ATM	Q13315	D2721N	CANCER	probably damaging	Deleterious	Damaging
OAK/POPLAR	ATM	Q13315	I2401T	PASSENGER/OTHER	probably damaging	Deleterious	Damaging
OAK/POPLAR	ATM	Q13315	N1430Y	CANCER	possibly damaging	Deleterious	Damaging
OAK/POPLAR	ATM	Q13315	H2038Y	CANCER	probably damaging	Deleterious	Damaging
OAK/POPLAR	ATM	Q13315	R2461P	CANCER	probably damaging	Deleterious	Damaging
OAK/POPLAR	ATM	Q13315	Q91H	CANCER	benign	Neutral	Tolerated
OAK/POPLAR	ATM	Q13315	L2211I	CANCER	probably damaging	Neutral	Tolerated
OAK/POPLAR	ATM	Q13315	T1471S	PASSENGER/OTHER	possibly damaging	Neutral	Tolerated
OAK/POPLAR	ATM	Q13315	R1466Q	PASSENGER/OTHER	probably damaging	Neutral	Tolerated
OAK/POPLAR	ATM	Q13315	D2721Y	CANCER	probably damaging	Deleterious	Damaging
OAK/POPLAR	ATM	Q13315	S2489Y	CANCER	probably damaging	Deleterious	Damaging
OAK/POPLAR	ATM	Q13315	L1050P	CANCER	probably damaging	Deleterious	Damaging
OAK/POPLAR	ATM	Q13315	Y1844C	CANCER	probably damaging	Deleterious	Damaging
OAK/POPLAR	ATM	Q13315	L2850F	CANCER	probably damaging	Deleterious	Damaging
OAK/POPLAR	ATM	Q13315	F1025S	PASSENGER/OTHER	probably damaging	Deleterious	Damaging
OAK/POPLAR	ATM	Q13315	M1064L	PASSENGER/OTHER	benign	Neutral	Tolerated
OAK/POPLAR	ATM	Q13315	M2667I	CANCER	benign	Neutral	Tolerated
OAK/POPLAR	ATM	Q13315	Q561K	PASSENGER/OTHER	benign	Neutral	Tolerated
OAK/POPLAR	ATM	Q13315	K828M	CANCER	benign	Neutral	Damaging
OAK/POPLAR	ATM	Q13315	I326T	PASSENGER/OTHER	probably damaging	Neutral	Damaging
OAK/POPLAR	ATM	Q13315	V1292E	PASSENGER/OTHER	probably damaging	Deleterious	Damaging
OAK/POPLAR	ATM	Q13315	Q1015K	PASSENGER/OTHER	benign	Neutral	Tolerated
OAK/POPLAR	ATM	Q13315	Y2437N	CANCER	probably damaging	Deleterious	Damaging
OAK/POPLAR	ATM	Q13315	D2708N	CANCER	probably damaging	Deleterious	Damaging
OAK/POPLAR	ATR	Q13535	E449V	CANCER	benign	Neutral	Tolerated
OAK/POPLAR	ATR	Q13535	A1195S	PASSENGER/OTHER	benign	Neutral	Damaging
OAK/POPLAR	ATR	Q13535	L1002V	PASSENGER/OTHER	possibly damaging	Neutral	Damaging
OAK/POPLAR	ATR	Q13535	E734K	PASSENGER/OTHER	benign	Neutral	Tolerated
OAK/POPLAR	ATR	Q13535	K526R	CANCER	benign	Neutral	Tolerated
OAK/POPLAR	ATR	Q13535	I710V	PASSENGER/OTHER	benign	Neutral	Tolerated
OAK/POPLAR	ATR	Q13535	G1342C	CANCER	probably damaging	Deleterious	Damaging
OAK/POPLAR	ATR	Q13535	H1760Y	CANCER	possibly damaging	Neutral	Tolerated
OAK/POPLAR	ATR	Q13535	R2001L	CANCER	possibly damaging	Deleterious	Damaging
OAK/POPLAR	ATR	Q13535	E1704Q	PASSENGER/OTHER	probably damaging	Neutral	Tolerated
OAK/POPLAR	ATR	Q13535	D694Y	PASSENGER/OTHER	probably damaging	Neutral	Damaging
OAK/POPLAR	ATR	Q13535	C2326F	PASSENGER/OTHER	probably damaging	Deleterious	Damaging
OAK/POPLAR	ATR	Q13535	G2488R	CANCER	probably damaging	Deleterious	Damaging
OAK/POPLAR	ATR	Q13535	P1256R	CANCER	probably damaging	Deleterious	Damaging
OAK/POPLAR	ATR	Q13535	C1983R	CANCER	benign	Deleterious	Tolerated
OAK/POPLAR	ATR	Q13535	H506Y	CANCER	benign	Neutral	Damaging
OAK/POPLAR	ATR	Q13535	C1044S	PASSENGER/OTHER	possibly damaging	Neutral	Tolerated
OAK/POPLAR	BRCA1	P38398	S889F	CANCER	probably damaging	Deleterious	Damaging
OAK/POPLAR	BRCA1	P38398	H448Y	PASSENGER/OTHER	benign	Neutral	Tolerated
OAK/POPLAR	BRCA1	P38398	Q380E	PASSENGER/OTHER	probably damaging	Deleterious	Damaging
OAK/POPLAR	BRCA1	P38398	E1257K	PASSENGER/OTHER	benign	Neutral	Tolerated
OAK/POPLAR	BRCA1	P38398	R1074K	CANCER	possibly damaging	Neutral	Tolerated
OAK/POPLAR	BRCA1	P38398	I562V	PASSENGER/OTHER	benign	Neutral	Tolerated
OAK/POPLAR	BRCA1	P38398	Q172E	PASSENGER/OTHER	probably damaging	Neutral	Damaging
OAK/POPLAR	BRCA1	P38398	Y422N	PASSENGER/OTHER	possibly damaging	Deleterious	Tolerated
OAK/POPLAR	BRCA1	P38398	S1577P	PASSENGER/OTHER	benign	Neutral	Tolerated
OAK/POPLAR	BRCA1	P38398	R331S	PASSENGER/OTHER	probably damaging	Deleterious	Damaging
OAK/POPLAR	BRCA1	P38398	S1497P	CANCER	probably damaging	Neutral	Damaging
OAK/POPLAR	BRCA1	P38398	M1689I	PASSENGER/OTHER	benign	Neutral	Tolerated
OAK/POPLAR	BRCA1	P38398	I966L	CANCER	benign	Neutral	Tolerated
OAK/POPLAR	BRCA1	P38398	E765V	CANCER	probably damaging	Deleterious	Damaging
OAK/POPLAR	BRCA1	P38398	D40N	PASSENGER/OTHER	probably damaging	Neutral	Damaging
OAK/POPLAR	BRCA1	P38398	V1792L	CANCER	benign	Neutral	Damaging
OAK/POPLAR	BRCA2	P51587	L98S	PASSENGER/OTHER	benign	Neutral	Damaging
OAK/POPLAR	BRCA2	P51587	D1033N	CANCER	probably damaging	Deleterious	Damaging
OAK/POPLAR	BRCA2	P51587	S70T	PASSENGER/OTHER	possibly damaging	Neutral	Tolerated
OAK/POPLAR	BRCA2	P51587	R1512C	PASSENGER/OTHER	benign	Neutral	Tolerated
OAK/POPLAR	BRCA2	P51587	D479H	PASSENGER/OTHER	probably damaging	Neutral	Damaging
OAK/POPLAR	BRCA2	P51587	V948A	PASSENGER/OTHER	benign	Deleterious	Damaging
OAK/POPLAR	BRCA2	P51587	E764K	PASSENGER/OTHER	benign	Neutral	Tolerated
OAK/POPLAR	BRCA2	P51587	S278R	PASSENGER/OTHER	benign	Neutral	Damaging
OAK/POPLAR	BRCA2	P51587	G602E	PASSENGER/OTHER	benign	Neutral	Tolerated
OAK/POPLAR	BRCA2	P51587	H1003Q	CANCER	benign	Deleterious	Tolerated
OAK/POPLAR	BRCA2	P51587	A1826S	PASSENGER/OTHER	benign	Neutral	Damaging
OAK/POPLAR	BRCA2	P51587	E1838D	CANCER	benign	Neutral	Tolerated
OAK/POPLAR	BRCA2	P51587	V1854F	CANCER	probably damaging	Deleterious	Damaging
OAK/POPLAR	BRCA2	P51587	I3113V	CANCER	benign	Neutral	Tolerated
OAK/POPLAR	BRCA2	P51587	K2339T	CANCER	benign	Neutral	Tolerated
OAK/POPLAR	BRCA2	P51587	E471Q	PASSENGER/OTHER	benign	Neutral	Tolerated
OAK/POPLAR	BRCA2	P51587	D1080N	PASSENGER/OTHER	benign	Neutral	Tolerated
OAK/POPLAR	BRCA2	P51587	H1561Q	PASSENGER/OTHER	possibly damaging	Deleterious	Damaging
OAK/POPLAR	BRCA2	P51587	I2285M	CANCER	possibly damaging	Neutral	Damaging
OAK/POPLAR	CHEK2	O96017	D162H	CANCER	probably damaging	Deleterious	Damaging
OAK/POPLAR	CHEK2	O96017	F292S	PASSENGER/OTHER	probably damaging	Deleterious	Damaging
OAK/POPLAR	CHEK2	O96017	F115S	CANCER	probably damaging	Deleterious	Damaging
OAK/POPLAR	CHEK2	O96017	H483L	PASSENGER/OTHER	probably damaging	Deleterious	Damaging
OAK/POPLAR	CHEK2	O96017	F201V	CANCER	probably damaging	Deleterious	Damaging
OAK/POPLAR	CHEK2	O96017	I160T	CANCER	probably damaging	Deleterious	Damaging
OAK/POPLAR	CHEK2	O96017	Q487R	PASSENGER/OTHER	benign	Neutral	Tolerated
OAK/POPLAR	CHEK2	O96017	Y404C	PASSENGER/OTHER	probably damaging	Deleterious	Damaging
OAK/POPLAR	CHEK2	O96017	A94T	CANCER	possibly damaging	Neutral	Damaging
OAK/POPLAR	CHEK2	O96017	C121Y	CANCER	probably damaging	Deleterious	Damaging
OAK/POPLAR	CHEK2	O96017	F169C	CANCER	probably damaging	Deleterious	Damaging
OAK/POPLAR	CHEK2	O96017	T387A	PASSENGER/OTHER	possibly damaging	Deleterious	Damaging
OAK/POPLAR	CHEK2	O96017	R148G	CANCER	probably damaging	Deleterious	Damaging
OAK/POPLAR	CHEK2	O96017	S372C	PASSENGER/OTHER	probably damaging	Deleterious	Damaging
OAK/POPLAR	CHEK2	O96017	I299V	PASSENGER/OTHER	benign	Neutral	Damaging
OAK/POPLAR	CHEK2	O96017	R346C	PASSENGER/OTHER	probably damaging	Deleterious	Damaging
OAK/POPLAR	CHEK2	O96017	E4D	PASSENGER/OTHER	benign	Neutral	Damaging
OAK/POPLAR	CHEK2	O96017	R521Q	PASSENGER/OTHER	probably damaging	Neutral	Damaging
OAK/POPLAR	CHEK2	O96017	A190T	CANCER	possibly damaging	Neutral	Damaging
OAK/POPLAR	CHEK2	O96017	G232E	PASSENGER/OTHER	probably damaging	Deleterious	Damaging
OAK/POPLAR	CHEK2	O96017	V198D	CANCER	probably damaging	Deleterious	Damaging
OAK/POPLAR	CHEK2	O96017	V175A	CANCER	possibly damaging	Deleterious	Damaging
OAK/POPLAR	CHEK2	O96017	P92H	CANCER	probably damaging	Deleterious	Damaging
OAK/POPLAR	FANCA	O15360	T1373K	PASSENGER/OTHER	probably damaging	Deleterious	Damaging
OAK/POPLAR	FANCA	O15360	S91N	PASSENGER/OTHER	benign	Neutral	Tolerated
OAK/POPLAR	FANCA	O15360	D924H	PASSENGER/OTHER	possibly damaging	Neutral	Damaging
OAK/POPLAR	FANCA	O15360	M262I	PASSENGER/OTHER	benign	Neutral	Tolerated
OAK/POPLAR	FANCA	O15360	L946V	PASSENGER/OTHER	probably damaging	Neutral	Damaging
OAK/POPLAR	FANCA	O15360	V107I	PASSENGER/OTHER	possibly damaging	Neutral	Tolerated
OAK/POPLAR	FANCA	O15360	R460Q	PASSENGER/OTHER	possibly damaging	Neutral	Tolerated
OAK/POPLAR	FANCA	O15360	R255G	PASSENGER/OTHER	benign	Deleterious	Tolerated
OAK/POPLAR	FANCA	O15360	P594L	PASSENGER/OTHER	probably damaging	Deleterious	Damaging
OAK/POPLAR	FANCA	O15360	V30F	PASSENGER/OTHER	probably damaging	Neutral	Damaging
OAK/POPLAR	FANCA	O15360	S884F	PASSENGER/OTHER	possibly damaging	Neutral	Tolerated
OAK/POPLAR	FANCC	Q00597	H452Q	PASSENGER/OTHER	benign	Deleterious	Tolerated
OAK/POPLAR	FANCG	O15287	Q107R	PASSENGER/OTHER	probably damaging	Neutral	Tolerated
OAK/POPLAR	FANCG	O15287	F476I	PASSENGER/OTHER	probably damaging	Deleterious	Damaging
OAK/POPLAR	MRE11	P49959	R572L	CANCER	probably damaging	Deleterious	Tolerated
OAK/POPLAR	MRE11	P49959	V429L	CANCER	possibly damaging	Neutral	Damaging
OAK/POPLAR	MRE11	P49959	D596V	CANCER	benign	Neutral	Tolerated
OAK/POPLAR	MRE11	P49959	R400G	CANCER	probably damaging	Deleterious	Damaging
OAK/POPLAR	MRE11	P49959	A526S	CANCER	benign	Neutral	Tolerated
OAK/POPLAR	MRE11	P49959	F214Y	PASSENGER/OTHER	probably damaging	Neutral	Damaging
OAK/POPLAR	MUTYH	Q9UIF7	V232I	PASSENGER/OTHER	possibly damaging	Neutral	Damaging
OAK/POPLAR	PALB2	Q86YC2	P338L	PASSENGER/OTHER	benign	Neutral	Tolerated
OAK/POPLAR	PALB2	Q86YC2	Y1064F	PASSENGER/OTHER	probably damaging	Deleterious	Damaging
OAK/POPLAR	PALB2	Q86YC2	S578G	PASSENGER/OTHER	benign	Neutral	Tolerated
OAK/POPLAR	PALB2	Q86YC2	C724R	PASSENGER/OTHER	probably damaging	Deleterious	Damaging
OAK/POPLAR	PALB2	Q86YC2	A1115S	PASSENGER/OTHER	possibly damaging	Neutral	Tolerated
OAK/POPLAR	PALB2	Q86YC2	P782R	PASSENGER/OTHER	possibly damaging	Neutral	Damaging
OAK/POPLAR	PALB2	Q86YC2	I1035T	PASSENGER/OTHER	probably damaging	Deleterious	Damaging
OAK/POPLAR	PALB2	Q86YC2	W575L	PASSENGER/OTHER	benign	Neutral	Tolerated
OAK/POPLAR	PALB2	Q86YC2	R160T	PASSENGER/OTHER	possibly damaging	Neutral	Damaging
OAK/POPLAR	PALB2	Q86YC2	Q370K	PASSENGER/OTHER	benign	Neutral	Tolerated
OAK/POPLAR	PALB2	Q86YC2	E367D	PASSENGER/OTHER	possibly damaging	Neutral	Tolerated
OAK/POPLAR	PALB2	Q86YC2	A579P	PASSENGER/OTHER	probably damaging	Neutral	Damaging
OAK/POPLAR	PALB2	Q86YC2	E749K	PASSENGER/OTHER	possibly damaging	Neutral	Damaging
OAK/POPLAR	PALB2	Q86YC2	S689L	PASSENGER/OTHER	benign	Neutral	Tolerated
OAK/POPLAR	PALB2	Q86YC2	D277Y	PASSENGER/OTHER	benign	Neutral	Damaging
OAK/POPLAR	POLD1	P28340	R423C	PASSENGER/OTHER	probably damaging	Deleterious	Damaging
OAK/POPLAR	POLD1	P28340	A749S	PASSENGER/OTHER	possibly damaging	Neutral	Tolerated
OAK/POPLAR	POLD1	P28340	P972A	PASSENGER/OTHER	possibly damaging	Deleterious	Damaging
OAK/POPLAR	POLD1	P28340	D391N	PASSENGER/OTHER	probably damaging	Deleterious	Damaging
OAK/POPLAR	POLD1	P28340	T1017R	PASSENGER/OTHER	benign	Deleterious	Damaging
OAK/POPLAR	POLD1	P28340	P818L	PASSENGER/OTHER	benign	Deleterious	Damaging
OAK/POPLAR	POLD1	P28340	M824I	PASSENGER/OTHER	benign	Deleterious	Tolerated
OAK/POPLAR	POLD1	P28340	R1050L	PASSENGER/OTHER	benign	Deleterious	Tolerated
OAK/POPLAR	POLD1	P28340	G754R	CANCER	probably damaging	Deleterious	Damaging
OAK/POPLAR	POLD1	P28340	N264K	PASSENGER/OTHER	possibly damaging	Neutral	Damaging
OAK/POPLAR	POLD1	P28340	A771V	PASSENGER/OTHER	probably damaging	Deleterious	Damaging
OAK/POPLAR	POLD1	P28340	G1103V	PASSENGER/OTHER	benign	Neutral	Tolerated
OAK/POPLAR	POLD1	P28340	R126H	PASSENGER/OTHER	probably damaging	Deleterious	Damaging
OAK/POPLAR	POLD1	P28340	V556L	PASSENGER/OTHER	benign	Neutral	Tolerated
OAK/POPLAR	POLE	Q07864	V1887L	PASSENGER/OTHER	benign	Neutral	Tolerated
OAK/POPLAR	POLE	Q07864	C2238Y	PASSENGER/OTHER	probably damaging	Deleterious	Damaging
OAK/POPLAR	POLE	Q07864	S681R	PASSENGER/OTHER	possibly damaging	Deleterious	Damaging
OAK/POPLAR	POLE	Q07864	D301N	PASSENGER/OTHER	probably damaging	Deleterious	Damaging
OAK/POPLAR	POLE	Q07864	E256Q	PASSENGER/OTHER	benign	Neutral	Tolerated
OAK/POPLAR	POLE	Q07864	S1353C	PASSENGER/OTHER	possibly damaging	Deleterious	Damaging
OAK/POPLAR	POLE	Q07864	P1432L	PASSENGER/OTHER	probably damaging	Deleterious	Damaging
OAK/POPLAR	POLE	Q07864	V627M	PASSENGER/OTHER	probably damaging	Deleterious	Damaging
OAK/POPLAR	POLE	Q07864	A939T	PASSENGER/OTHER	probably damaging	Deleterious	Damaging
OAK/POPLAR	POLE	Q07864	D45G	PASSENGER/OTHER	probably damaging	Deleterious	Damaging
OAK/POPLAR	POLE	Q07864	T1090K	PASSENGER/OTHER	probably damaging	Deleterious	Damaging
OAK/POPLAR	POLE	Q07864	E18Q	PASSENGER/OTHER	benign	Neutral	Tolerated
OAK/POPLAR	POLE	Q07864	E1715V	PASSENGER/OTHER	benign	Neutral	Tolerated
OAK/POPLAR	POLE	Q07864	G496C	PASSENGER/OTHER	probably damaging	Deleterious	Damaging
OAK/POPLAR	POLE	Q07864	Q2052H	PASSENGER/OTHER	probably damaging	Deleterious	Damaging
OAK/POPLAR	POLE	Q07864	R2027S	PASSENGER/OTHER	benign	Neutral	Tolerated
OAK/POPLAR	POLE	Q07864	R266Q	PASSENGER/OTHER	probably damaging	Neutral	Tolerated
OAK/POPLAR	POLE	Q07864	R825P	PASSENGER/OTHER	probably damaging	Deleterious	Damaging
OAK/POPLAR	POLE	Q07864	R1675C	PASSENGER/OTHER	probably damaging	Deleterious	Damaging
OAK/POPLAR	POLE	Q07864	P1389S	PASSENGER/OTHER	probably damaging	Deleterious	Damaging
OAK/POPLAR	RAD50	Q92878	A80T	PASSENGER/OTHER	probably damaging	Deleterious	Damaging
OAK/POPLAR	RAD50	Q92878	F1221V	PASSENGER/OTHER	probably damaging	Deleterious	Damaging
OAK/POPLAR	RAD50	Q92878	I853V	PASSENGER/OTHER	benign	Neutral	Tolerated
OAK/POPLAR	RAD50	Q92878	L268P	PASSENGER/OTHER	possibly damaging	Deleterious	Damaging
OAK/POPLAR	RAD50	Q92878	K722R	PASSENGER/OTHER	benign	Neutral	Tolerated
OAK/POPLAR	RAD50	Q92878	Q826R	PASSENGER/OTHER	benign	Neutral	Tolerated
OAK/POPLAR	RAD50	Q92878	K608R	PASSENGER/OTHER	benign	Neutral	Tolerated
OAK/POPLAR	RAD50	Q92878	R193P	PASSENGER/OTHER	probably damaging	Deleterious	Damaging
OAK/POPLAR	RAD52	P43351	H230P	PASSENGER/OTHER	benign	Neutral	Tolerated
OAK/POPLAR	RAD52	P43351	E122K	PASSENGER/OTHER	probably damaging	Deleterious	Damaging
OAK/POPLAR	RAD54L	Q92698	E379G	PASSENGER/OTHER	benign	Deleterious	Damaging
OAK/POPLAR	RAD54L	Q92698	M570T	PASSENGER/OTHER	probably damaging	Deleterious	Damaging
OAK/POPLAR	XRCC2	O43543	V39L	PASSENGER/OTHER	benign	Neutral	Tolerated
OAK/POPLAR	XRCC2	O43543	L227F	PASSENGER/OTHER	probably damaging	Neutral	Damaging
