# Supplementary material
Source: HighWire-hosted journal article supplement (https://jitc.bmj.com/content/8/2/e000946)
Supplement: inline-supplementary-material-2 [file inline-supplementary-material-2.xlsx]

## Sheet: Foglio1
Cohort	Gene	Variant
Rome	NOTCH3	G230fs*1
Rome	ATM	H1516fs*
Rome	ATM	R2506fs*
Rome	ATM	N2106_M2
Rome	ATR	E1986_P1
Rome	BRCA2	splice site 7618-2A>G
Rome	MUTYH	splice site 535-2A>G
Rome	RAD54L	P694fs*4
Rome	MUTYH	G382D
MSKCC PFS	NOTCH1	E2071_G2072delinsDC
MSKCC PFS	NOTCH1	H1544_S1551del
MSKCC PFS	NOTCH1	S137_P143del
MSKCC PFS	NOTCH2	E253*
MSKCC PFS	NOTCH3	X227_splice
MSKCC PFS	NOTCH3	W1434*
MSKCC PFS	NOTCH3	S1871*
MSKCC PFS	ATM	R2723*
MSKCC PFS	ATM	X1249_splice
MSKCC PFS	ATM	G2369*
MSKCC PFS	ATM	X2543_splice
MSKCC PFS	ATR	L1361_G1362delinsFW
MSKCC PFS	ATR	Q1627*
MSKCC PFS	BRCA1	E904*
MSKCC PFS	MRE11	X521_splice
MSKCC PFS	MRE11	X51_splice
MSKCC PFS	MRE11	X340_splice
MSKCC PFS	MUTYH	X309_splice
MSKCC PFS	POLE	E1533*
MSKCC OS	NOTCH1	S852_F853delinsRS
MSKCC OS	NOTCH1	E2071_G2072delinsDC
MSKCC OS	NOTCH1	Q1978*
MSKCC OS	NOTCH1	H1544_S1551del
MSKCC OS	NOTCH1	S137_P143del
MSKCC OS	NOTCH1	Q1400_G1401delinsHW
MSKCC OS	NOTCH2	E253*
MSKCC OS	NOTCH2	Q1677*
MSKCC OS	NOTCH3	W1434*
MSKCC OS	NOTCH3	S1871*
MSKCC OS	NOTCH3	X227_splice
MSKCC OS	ATM	X2543_splice
MSKCC OS	ATM	G2369*
MSKCC OS	ATM	X1773_splice
MSKCC OS	ATM	K2789*
MSKCC OS	ATM	R2486_S2489del
MSKCC OS	ATM	X1332_splice
MSKCC OS	ATR	L1361_G1362delinsFW
MSKCC OS	ATR	Q1627*
MSKCC OS	BRCA1	E848*
MSKCC OS	BRCA1	G911*
MSKCC OS	BRCA2	E1555*
MSKCC OS	BRCA2	E2959*
MSKCC OS	MRE11	X521_splice
MSKCC OS	MRE11	X51_splice
MSKCC OS	MRE11	X340_splice
MSKCC OS	MUTYH	X309_splice
MSKCC OS	POLE	E1417*
MSKCC OS	RAD50	E500*
OAK/POPLAR	NOTCH1	E948*
OAK/POPLAR	NOTCH1	E2506*
OAK/POPLAR	NOTCH1	Q139*
OAK/POPLAR	NOTCH1	Q1864*
OAK/POPLAR	NOTCH1	Y1938*
OAK/POPLAR	NOTCH1	Q139*
OAK/POPLAR	NOTCH1	Q1864*
OAK/POPLAR	NOTCH1	Y1938*
OAK/POPLAR	NOTCH1	p.Q1722*
OAK/POPLAR	NOTCH1	E1583*
OAK/POPLAR	ATM	W164*
OAK/POPLAR	ATM	K31*
OAK/POPLAR	ATM	R110*
OAK/POPLAR	ATM	G873*
OAK/POPLAR	ATM	Y2124*
OAK/POPLAR	ATR	Q257*
OAK/POPLAR	ATR	E588*
OAK/POPLAR	BRCA1	Q262*
OAK/POPLAR	BRCA1	K119*
OAK/POPLAR	BRCA1	S1474*
OAK/POPLAR	CHEK2	Y445*
OAK/POPLAR	CHEK2	E4*
OAK/POPLAR	CHEK2	W114*
OAK/POPLAR	CHEK2	L391*
OAK/POPLAR	FANCA	S1226*
OAK/POPLAR	FANCC	E405*
OAK/POPLAR	PALB2	S548*
OAK/POPLAR	POLE	E709*
